# Supplementary material for: Optimising age coverage of seasonal influenza vaccination in England: A mathematical and health economic evaluation
Source: PLoS Comput Biol. 2020 Oct 6;16(10):e1008278. doi: 10.1371/journal.pcbi.1008278 (PMC7567368; doi:10.1371/journal.pcbi.1008278)
Supplement: S1 File — Paediatric strategies covered the following age ranges: None, 4-10yrs (primary school only), 4-16yrs (primary and secondary school), 2-4yrs (pre-school only), 2-10yrs (pre-school and primary school aged children), and 2-16yrs (preschool, primary and secondary school). Per paediatric strategy, we considered five elder-age centric programmes, each having a varying breadth of age coverage: 50 years and above, 60 years and above, 70 years and above, 80 years and above, 90 years and above. Threshold vaccine dose prices reflect the value at which the programme becomes cost-effectiveness at a WTP of £20,000 per QALY, with 3.5% discounting for monetary costs and health effects. In all considered strategies, we assumed 10% vaccine wastage and an administration fee per deployed vaccine of £10. (XLSX) [file pcbi.1008278.s002.xlsx]

## Sheet: Sheet1
Threshold vaccine dose price versus a policy vaccinating at-risk group only. Predictions used the most likely set of parameters and give a cost effective threshold at £20,000 per QALY with 3.5% discounting.
All values in £.
	Paediatric coverage	None	Prim (4-10yrs)	PrimSec (4-16yrs)	Pre (2-4yrs)	PrePrim (2-10yrs)	PrePrimSec (2-16yrs)
Elde-age coverage
50+ yrs		8.59	10.54	12.67	9.63	9.68	12.55
60+yrs		5.22	12.38	13.59	9.36	11.14	13.53
70+yrs		1.63	17.66	17	12.2	15.18	16.62
80+yrs		2.23	25.31	21.43	20.71	20.53	20.39
90+yrs		8.02	29.12	23.32	26.77	22.96	21.94
